# Supplementary material for: Evaluation of Antioxidant and Anticancer Activity of Mono- and Polyfloral Moroccan Bee Pollen by Characterizing Phenolic and Volatile Compounds
Source: MDPI journal article supplement (doi:10.3390/molecules28020835), 2023-01-13
Supplement: s1 [file s1]

## Supplementary Material

# Evaluation of Antioxidant and Anticancer Activity of Mono- and Polyfloral Moroccan Bee Pollen by Characterizing Phenolic and Volatile Compounds

Volkan Aylanc <sup>1,2,3</sup>, Samar Larbi <sup>1,2,4</sup>, Ricardo Calhella <sup>1,2</sup>, Lillian Barros <sup>1,2</sup>, Ferial Rezouga <sup>4</sup>,  
María Shantal Rodríguez-Flores <sup>5</sup>, María Carmen Seijo <sup>5</sup>, Asmae El Ghouizi <sup>6</sup>, Badiaa Lyoussi <sup>6</sup>, Soraia I. Falcão <sup>1,2,\*</sup>  
and Miguel Vilas-Boas <sup>1,2,\*</sup>

- <sup>1</sup> Centro de Investigação de Montanha (CIMO), Instituto Politécnico de Bragança, Campus de Santa Apolónia, 5300-253 Bragança, Portugal
  - <sup>2</sup> Laboratório Associado para a Sustentabilidade e Tecnologia em Regiões de Montanha (SusTEC), Instituto Politécnico de Bragança, Campus de Santa Apolónia, 5300-253 Bragança, Portugal
  - <sup>3</sup> Departamento de Química e Bioquímica, Faculdade de Ciências, Universidade do Porto, 4169-007 Porto, Portugal
  - <sup>4</sup> Département de Génies Biologique et Agroalimentaire, Université Libre de Tunis, 30 Avenue Kheireddine Pacha, Tunis 1002, Tunisia
  - <sup>5</sup> Facultad de Ciencias, Universidad de Vigo, Campus As Lagoas, 36310 Vigo, Pontevedra, Spain
  - <sup>6</sup> Laboratory Physiology-Pharmacology and Environmental Health, Faculty of Sciences Dhar El Mehraz, University Sidi Mohamed Ben Abdallah, Fez 30050, Morocco
- \* Correspondence: sfalcao@ipb.pt (S.I.F.); mvboas@ipb.pt (M.V.-B.); Tel.: +351-273303401 (S.I.F.); +351-273303309 (M.V.-B.)

**Table S1.** Chromatographic and mass specifications for the phenolic and phenylamide observed in bee pollen.

| Peak | tr (min) | $\lambda_{\max}$ (nm) | [M-H] <sup>-</sup> m/z | MS <sup>a</sup> (% base peak)                                                                             | Proposed Compound                                                       |
|------|----------|-----------------------|------------------------|-----------------------------------------------------------------------------------------------------------|-------------------------------------------------------------------------|
| 1    | 4.0      | 290, 322              | 341                    | MS <sup>2</sup> :179 (100), 135 (2)                                                                       | Caffeic acid hexoside <sup>a,c</sup>                                    |
| 2    | 4.0      | 292, 322              | 179                    | MS <sup>2</sup> :179                                                                                      | Caffeic acid <sup>a,b</sup>                                             |
| 3    | 4.1      | 300                   | 325                    | MS <sup>2</sup> :163 (100)                                                                                | <i>p</i> -coumaric acid hexoside <sup>a</sup>                           |
| 4    | 6.7      | 259, 356              | 625                    | MS <sup>2</sup> :317 (100)                                                                                | Myricetin-3- <i>O</i> -rutinoside <sup>a,d</sup>                        |
| 5    | 7.5      | 257, 353              | 625                    | MS <sup>2</sup> :301 (100), 300 (90), 445 (82), 271 (15)                                                  | Quercetin- <i>O</i> -diglucoside <sup>a,d</sup>                         |
| 6    | 8.1      | 258, 255              | 667                    | MS <sup>2</sup> :316 (100), 317 (20), 625 (29)                                                            | Myricetin- <i>O</i> -acetyl deoxyhexosyl-hexoside <sup>a</sup>          |
| 7    | 8.4      | 267, 347              | 639                    | MS <sup>2</sup> :315 (100), 477 (74), 300 (5); MS <sup>3</sup> : 300 (100)                                | Methylherbacetin- <i>O</i> -dihexoside <sup>a,e</sup>                   |
| 8    | 9.1      | 257, 357              | 479                    | MS <sup>2</sup> :317 (100)                                                                                | Myricetin- <i>O</i> -hexoside <sup>a</sup>                              |
| 9    | 9.7      | 256, 352              | 595                    | MS <sup>2</sup> :271 (11), 300 (100), 301 (56), 445 (37), 463 (25)                                        | Quercetin- <i>O</i> -pentosyl-hexoside <sup>a,f</sup>                   |
| 10   | 9.7      | 257, 354              | 609                    | MS <sup>2</sup> :300 (100), 301(47)                                                                       | Quercetin-3- <i>O</i> -rutinoside <sup>a,d</sup>                        |
| 11   | 10.2     | 266, 348              | 609                    | MS <sup>2</sup> :285 (95), 429 (100), 447 (12)                                                            | Kaempferol- <i>O</i> -diglucoside <sup>a,g</sup>                        |
| 12   | 10.5     | 254, 353              | 623                    | MS <sup>2</sup> :477 (100), 461 (50), 315 (11)                                                            | Isorhamnetin- <i>O</i> -deoxyhexosyl- <i>O</i> -hexoside <sup>a,f</sup> |
| 13   | 10.5     | 259, 355              | 565                    | MS <sup>2</sup> :521 (100); MS <sup>3</sup> : 316 (100), 317 (46), 479 (21)                               | Myricetin- <i>O</i> -malonyl hexoside <sup>a</sup>                      |
| 14   | 10.7     | 269, 347              | 623                    | MS <sup>2</sup> :299 (58), 300 (37), 314 (100), 315 (70), 459 (89), 608 (32); MS <sup>3</sup> : 299 (100) | Methylherbacetin-3- <i>O</i> -rutinoside <sup>a,e</sup>                 |
| 15   | 11.0     | 266, 347              | 593                    | MS <sup>2</sup> :285 (8), 431 (50), 447 (100)                                                             | Kaempferol- <i>O</i> -deoxyhexosyl- <i>O</i> -hexoside <sup>a,h</sup>   |

|    |      |          |     |                                                                              |                                                                                                                                      |
|----|------|----------|-----|------------------------------------------------------------------------------|--------------------------------------------------------------------------------------------------------------------------------------|
| 16 | 11.6 | 254, 354 | 609 | MS <sup>2</sup> : 315 (100)                                                  | Isorhamnetin-O-pentosyl-hexoside <sup>a,d</sup>                                                                                      |
| 17 | 11.6 | 254, 354 | 609 | MS <sup>2</sup> : 315 (100)                                                  | Isorhamnetin-O-pentosyl-hexoside (isomer) <sup>a,d</sup>                                                                             |
| 18 | 11.6 | 310      | 163 | MS <sup>2</sup> : 118 (100)                                                  | <i>p</i> -coumaric acid <sup>a,b</sup>                                                                                               |
| 19 | 11.8 | 256, 355 | 695 | MS <sup>2</sup> : 651 (100); MS <sup>3</sup> : 609 (100), 300 (82), 301 (16) | Quercetin-O-malonyl deoxyhexosyl-hexoside <sup>a</sup>                                                                               |
| 20 | 12.1 | 267, 347 | 593 | MS <sup>2</sup> : 284 (100), 285 (69)                                        | Kaempferol-3-O-rutinoside <sup>a,e</sup>                                                                                             |
| 21 | 12.3 | 254, 354 | 623 | MS <sup>2</sup> : 314 (100), 315 (85), 459 (80)                              | Isorhamnetin-3-O-hexosyl-deoxyhexoside <sup>a</sup>                                                                                  |
| 22 | 12.6 | 256, 354 | 463 | MS <sup>2</sup> : 301 (100)                                                  | Quercetin-3-O-glucoside <sup>a,e</sup>                                                                                               |
| 23 | 12.6 | 253, 352 | 709 | MS <sup>2</sup> : 665 (100); MS <sup>3</sup> : 314 (100), 315 (34)           | Isorhamnetin-O-malonyl rutinoside <sup>a,i</sup>                                                                                     |
| 24 | 13.0 | 255, 354 | 695 | MS <sup>2</sup> : 651 (100); MS <sup>3</sup> : 315 (100), 300 (22)           | Isorhamnetin-O-malonyl pentosyl-hexoside <sup>a</sup>                                                                                |
| 25 | 13.3 | 256, 353 | 549 | MS <sup>2</sup> : 505 (100); MS <sup>3</sup> : 301 (100)                     | Quercetin-O-malonyl hexoside <sup>a,i</sup>                                                                                          |
| 26 | 13.5 | 254, 359 | 579 | MS <sup>2</sup> : 535 (100); MS <sup>3</sup> : 330 (34), 331 (100), 493 (12) | 3',4',5',3,5,6,7-heptahydroxy-flavonol-O-malonyl hexoside <sup>a</sup>                                                               |
| 27 | 13.9 | 254, 355 | 549 | MS <sup>2</sup> : 505 (100); MS <sup>3</sup> : 301 (100)                     | Quercetin-O-malonyl hexoside (isomer) <sup>a,i</sup>                                                                                 |
| 28 | 14.2 | 254, 347 | 447 | MS <sup>2</sup> : 301 (100)                                                  | Quercetin-3-O-rhamnoside <sup>a,h</sup>                                                                                              |
| 29 | 14.3 | 253,351  | 477 | MS <sup>2</sup> : 314 (100), 315 (53)                                        | Isorhamnetin-3-O-glucoside <sup>a,d</sup>                                                                                            |
| 30 | 15.0 | 265, 347 | 533 | MS <sup>2</sup> : 489; MS <sup>3</sup> : 285 (100)                           | Kaempferol-O-malonyl rutinoside <sup>a</sup>                                                                                         |
| 31 | 15.4 | 254, 354 | 563 | MS <sup>2</sup> : 315 (100)                                                  | Isorhamnetin-O-malonyl hexoside <sup>a,i</sup>                                                                                       |
| 32 | 16.2 | 264, 341 | 431 | MS <sup>2</sup> : 285 (100)                                                  | Kaempferol-3-O-rhamnoside <sup>a,e</sup>                                                                                             |
| 33 | 16.3 | 256, 349 | 447 | MS <sup>2</sup> : 301 (100)                                                  | Quercetin-3-O-rhamnoside <sup>a,d</sup>                                                                                              |
| 34 | 19.3 | 298, 308 | 614 | MS <sup>2</sup> : 494 (24), 478 (100), 452 (78), 358 (18)                    | <i>N</i> <sup>1</sup> - <i>p</i> -coumaroyl- <i>N</i> <sup>5</sup> , <i>N</i> <sup>10</sup> -dicaffeoylspermidine <sup>a,d,e</sup>   |
| 35 | 21.2 | 290, 309 | 582 | 462 (100)                                                                    | <i>N</i> <sup>1</sup> , <i>N</i> <sup>5</sup> , <i>N</i> <sup>10</sup> -tri- <i>p</i> -coumaroylspermidine <sup>a,d,e</sup>          |
| 36 | 21.3 | 268, 347 | 285 | MS <sup>2</sup> : 285 (100), 257 (13), 151 (20)                              | Kaempferol <sup>a,b</sup>                                                                                                            |
| 37 | 22.0 | 353, 370 | 315 | MS <sup>2</sup> : 300 (100)                                                  | Isorhamnetin <sup>a,b</sup>                                                                                                          |
| 38 | 22.2 | 299, 310 | 598 | MS <sup>2</sup> : 462 (100), 478 (39), 452 (34), 342 (14)                    | <i>N</i> <sup>1</sup> , <i>N</i> <sup>5</sup> -di- <i>p</i> -coumaroyl- <i>N</i> <sup>10</sup> -caffeoylspermidine <sup>a,d</sup>    |
| 39 | 22.8 | 295, 310 | 582 | MS <sup>2</sup> : 462 (100), 436 (9), 342(7)                                 | <i>N</i> <sup>1</sup> , <i>N</i> <sup>5</sup> , <i>N</i> <sup>10</sup> -tri- <i>p</i> -coumaroylspermidine (isomer) <sup>a,d,e</sup> |
| 40 | 24.1 | 295, 310 | 582 | MS <sup>2</sup> : 462 (100), 436 (9), 342 (6)                                | <i>N</i> <sup>1</sup> , <i>N</i> <sup>5</sup> , <i>N</i> <sup>10</sup> -tri- <i>p</i> -coumaroylspermidine (isomer) <sup>a,d,e</sup> |
| 41 | 25.0 | 295, 310 | 582 | MS <sup>2</sup> : 462 (100), 436 (9), 342 (7)                                | <i>N</i> <sup>1</sup> , <i>N</i> <sup>5</sup> , <i>N</i> <sup>10</sup> -tri- <i>p</i> -coumaroylspermidine (isomer) <sup>a,d</sup>   |
| 42 | 26.5 | 295, 310 | 582 | MS <sup>2</sup> : 462 (100), 436 (10), 342 (7)                               | <i>N</i> <sup>1</sup> , <i>N</i> <sup>5</sup> , <i>N</i> <sup>10</sup> -tri- <i>p</i> -coumaroylspermidine (isomer) <sup>a,d,e</sup> |
| 43 | 27.0 | 270      | 785 | MS <sup>2</sup> : 665 (100), 545 (14), 639 (13)                              | Tetracoumaroyl spermine <sup>a,e</sup>                                                                                               |
| 44 | 28.7 | 280, 307 | 785 | MS <sup>2</sup> : 665 (100), 545 (14), 639 (13)                              | Tetracoumaroyl spermine (isomer) <sup>a,e</sup>                                                                                      |
| 45 | 29.3 | 277, 310 | 785 | MS <sup>2</sup> : 665 (100), 545 (14), 639 (13)                              | Tetracoumaroyl spermine (isomer) <sup>a,e</sup>                                                                                      |
| 46 | 30.3 | 289, 306 | 785 | MS <sup>2</sup> : 665 (100), 545 (14), 639 (13)                              | Tetracoumaroyl spermine (isomer) <sup>a,e</sup>                                                                                      |
| 47 | 31.9 | 293, 310 | 785 | MS <sup>2</sup> : 665 (100), 545 (14), 639 (13)                              | Tetracoumaroyl spermine (isomer) <sup>a,e</sup>                                                                                      |
| 48 | 34.0 | 299, 310 | 785 | MS <sup>2</sup> : 665 (100), 545 (14), 639 (13)                              | Tetracoumaroyl spermine (isomer) <sup>a,e</sup>                                                                                      |

Confirmed with: <sup>a</sup> MS<sup>n</sup> fragmentation; <sup>b</sup> Standard; References: <sup>c</sup> Kang et al. [1]; <sup>d</sup> El Ghouizi et al. [2]; <sup>e</sup> Aylanc et al. [3]; <sup>f</sup> Sobral et al. [4]; <sup>g</sup> Llorach et al. [5]; <sup>h</sup> Falcão et al. [6]; <sup>i</sup> Mihajlovic et al. [7]. BP: bee pollen.

**Table S2.** Retention time (Rt) and calculated LRI for volatile compounds found in Moroccan bee pollen samples.

| Peak | Rt   | Compound                                    | LRI  |
|------|------|---------------------------------------------|------|
| 1    | 2.6  | 2-propenylidene-cyclobutene                 | 730  |
| 2    | 3.1  | Hexanal                                     | 768  |
| 3    | 4.2  | 2-hexenal                                   | 830  |
| 4    | 5.4  | Heptanal                                    | 883  |
| 5    | 5.8  | 2,5-dimethyl-pyrazine                       | 901  |
| 6    | 6.9  | 1,2-cyclopentanedione                       | 933  |
| 7    | 8.3  | 2,4-heptadienal                             | 998  |
| 8    | 8.8  | Ethyl hexanoate                             | 999  |
| 9    | 8.9  | Octanal                                     | 988  |
| 10   | 9.3  | 2,4-heptadienal (isomer)                    | 998  |
| 11   | 9.6  | Hexanoic acid                               | 1010 |
| 12   | 9.9  | Eucalyptol                                  | 1016 |
| 13   | 11.7 | 3,5-octadien-2-one                          | 1057 |
| 14   | 11.9 | 2,6,6-trimethylbicyclo[3.1.1]hept-3-ylamine | 1160 |
| 15   | 12.7 | 3,5-octadien-2-one (isomer)                 | 1079 |
| 16   | 13.2 | Nonanal                                     | 1091 |
| 17   | 13.2 | Cis- $\beta$ -terpineol                     | 1093 |
| 18   | 14.1 | Methyl octanoate                            | 1113 |
| 19   | 15.1 | Lilac aldehyde D                            | 1138 |
| 20   | 15.4 | 2,6-nonadienal                              | 1142 |
| 21   | 15.7 | Isopinocarveol                              | 1148 |
| 22   | 17.3 | Octanoic acid                               | 1184 |
| 23   | 17.5 | Ethyl octanoate                             | 1183 |
| 24   | 17.8 | Lilac alcohol D                             | 1195 |
| 25   | 18.1 | $\beta$ -cyclocitral                        | 1201 |
| 26   | 18.6 | Methyl 7-hexanoate                          | 1212 |
| 27   | 18.7 | Methyl nonanoate                            | 1213 |
| 28   | 19.8 | Anisaldehyde                                | 1238 |
| 29   | 19.9 | Geranyl vinyl ether                         | 1240 |
| 30   | 21.1 | 3-cyclohex-1-enyl-prop-2-enal               | 1269 |
| 31   | 21.3 | 2-methyl-1-nonene-3-ine                     | 1271 |
| 32   | 21.9 | Ethyl nonanoate                             | 1285 |
| 33   | 22.0 | Nonanoic acid                               | 1287 |
| 34   | 23.3 | Methyl 8-methyl-nonanoate                   | 1315 |
| 35   | 25.9 | 3-methyl-2-pent-2-enyl-cyclopent-2-enone    | 1376 |
| 36   | 26.3 | Ethyl decanoate                             | 1377 |
| 37   | 26.3 | Methyl octanoate                            | 1385 |
| 38   | 26.7 | Caryophyllene                               | 1394 |
| 39   | 27.4 | Decanoic acid                               | 1411 |

|    |      |                                        |      |
|----|------|----------------------------------------|------|
| 40 | 28.4 | 6,10-dimethyl-5,9-undecadien-2-one     | 1425 |
| 41 | 28.5 | 4,6-dimethyl-(Z)-5,9-undecadien-2-one  | 1435 |
| 42 | 29.6 | $\beta$ -ionone                        | 1499 |
| 43 | 29.8 | $\beta$ -ionone epoxide                | 1466 |
| 44 | 31.8 | 10-methyl-methyl undecanoate           | 1516 |
| 45 | 34.8 | Ethyl decanoate                        | 1592 |
| 46 | 34.9 | Ethyl dodecanoate                      | 1594 |
| 47 | 36.0 | 5-(1-piperidyl)-furan-2-carboxaldehyde | 1693 |

LRI: Linear retention index determined on a DB-5 MS fused silica column relative to a series of *n*-alkanes (C<sub>7</sub>–C<sub>36</sub>). Rt: Retention time; BP: bee pollen.

## References

- [1] Kang, J.; Price, W. E.; Ashton, J.; Tapsell, L. C.; Johnson, S. Identification and characterization of phenolic compounds in hydromethanolic extracts of sorghum wholegrains by LC-ESI-MSn. *Food Chem* **2016**, *211*, 215–226.
- [2] el Ghouizi, A.; el Menyiy, N.; Falcão, S. I.; Vilas-Boas, M.; Lyoussi, B. Chemical composition, antioxidant activity, and diuretic effect of Moroccan fresh bee pollen in rats. *Vet World* **2020**, *13*, 1251.
- [3] Aylanc, V.; Tomás, A.; Russo-Almeida, P.; Falcão, S. I.; Vilas-Boas, M. Assessment of bioactive compounds under simulated gastrointestinal digestion of bee pollen and bee bread: Bioaccessibility and antioxidant activity. *Antioxidants* **2021**, *10*, 651.
- [4] Sobral, F.; Calhella, R. C.; Barros, L.; Dueñas, M.; Tomás, A.; Santos-Buelga, C.; Vilas-Boas, M.; Ferreira, I. C. F. R. Flavonoid composition and antitumor activity of bee bread collected in northeast Portugal. *Molecules* **2017**, *22*, 248.
- [5] Llorach, R.; Gil-Izquierdo, A.; Ferreres, F.; Tomás-Barberán, F. A. HPLC-DAD-MS/MS ESI Characterization of Unusual Highly Glycosylated Acylated Flavonoids from Cauliflower (*Brassica oleracea* L. var. *botrytis*) Agroindustrial Byproducts. *J Agric Food Chem* **2003**, *51*, 3895–3899.
- [6] Falcão, S. I.; Vale, N.; Gomes, P.; Domingues, M. R. M.; Freire, C.; Cardoso, S. M.; Vilas-Boas, M. Phenolic profiling of Portuguese propolis by LC–MS spectrometry: Uncommon propolis rich in flavonoid glycosides. *Phytochem Anal* **2012**, *24*, 309–318.
- [7] Mihajlovic, L.; Radosavljevic, J.; Burazer, L.; Smiljanic, K.; Velickovic, T. C. Composition of polyphenol and polyamide compounds in common ragweed (*Ambrosia artemisiifolia* L.) pollen and sub-pollen particles. *Phytochemistry* **2015**, *109*, 125–132.
